# Supplementary material for: Targeted Demethylation of FOXP3-TSDR Enhances the Suppressive Capacity of STAT6-deficient Inducible T Regulatory Cells
Source: Springer Nature journal article supplement (doi:10.1007/s10753-024-02031-4), 2024-05-03
Supplement: MOESM2 [file 27048418]

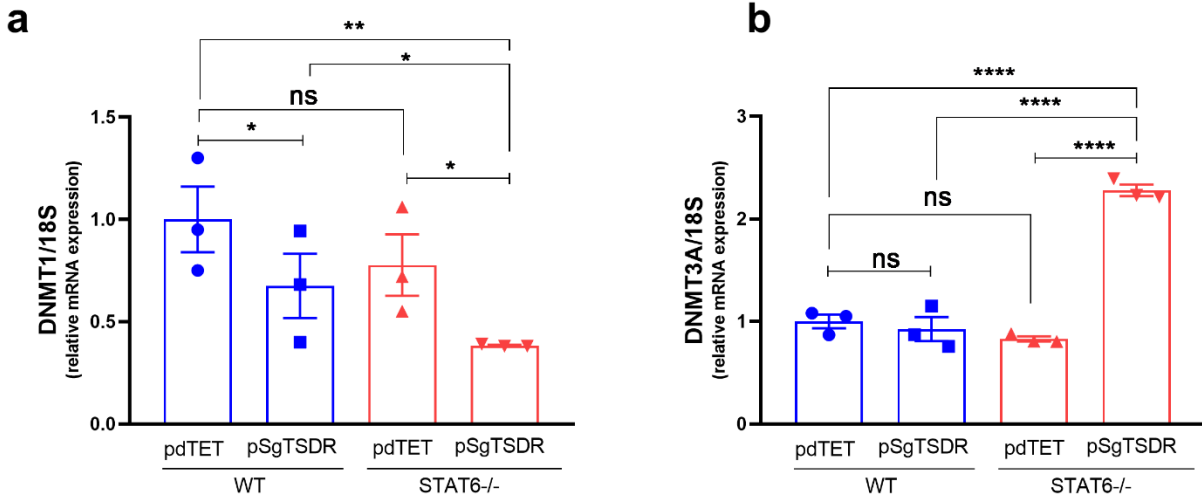

**Fig S2.** mRNA expression levels of DNA methyltransferases, DNMT1 (**a**) and DNMT3a (**b**), are altered by dCas9-TET1-mediated TSDR demethylation.
